# Supplementary material
Source: publisher figshare collection journal article supplement (https://brill.figshare.com/ndownloader/files/26241916)
Supplement: Supplementary file 1 [file 26241916]

Table A3. Variation in climatic variables over the length of the study period at the red-backed toadlet breeding site.

| Climatic variable | Daily average | Range |
| --- | --- | --- |
| Maximum temperature (ᵒC) | 23.49 | 12.6–39.6 |
| Minimum temperature (ᵒC) | 17.83 | 11.5–26.4 |
| Rainfall (mm) | 2.62 | 0–45.9 |
| Humidity (%) | 79.43 | 31.25–99 |
| Barometric pressure (hPa) | 1000.32 | 986.24–1016.51 |
| Wind speed (km/h) | 3.78 | 0.14–11.86 |
